# Supplementary material
Source: MDPI journal article supplement (https://www.mdpi.com/1999-4907/9/6/304)
Supplement: s1 [file s1]

## Supplementary Materials

Figure S1: Tissue samples of rubber tree flowers. Figure S2: The conserved domain logo and motif composition of HbMADS-box genes. Figure S3: Exon-intron structures of HbMads-box genes. Figure S4: Expression profiles of the floral-enriched HbMad-box genes under cold stress. Figure S5: Expression profiles of the floral-enriched HbMad-box genes under high temperature stress. Figure S6: Expression profiles of the floral-enriched HbMad-box genes under drought stress. Figure S7: Expression profiles of the floral-enriched HbMad-box genes under salt stress. Figure S8: Expression profiles of the floral-enriched HbMad-box genes responding to ABA treatment. Figure S9: Expression profiles of the floral-enriched HbMad-box genes responding to GA3 treatment. Table S1: List of primer sequences used for HbMad-box TFs amplification. Table S2: List of primer sequences used for qRT-PCR analysis. Table S3: Sequence features of AtMADSs in *A. thaliana*. Gene IDs, protein length, pI and molecular weight of corresponding AtMADSs in *A.thaliana* are shown. Table S4: Percent identity matrix of HbMad-box TFs proteins. Table S5: Statistics of exon and intron number distribution among HbMad-box TFs.

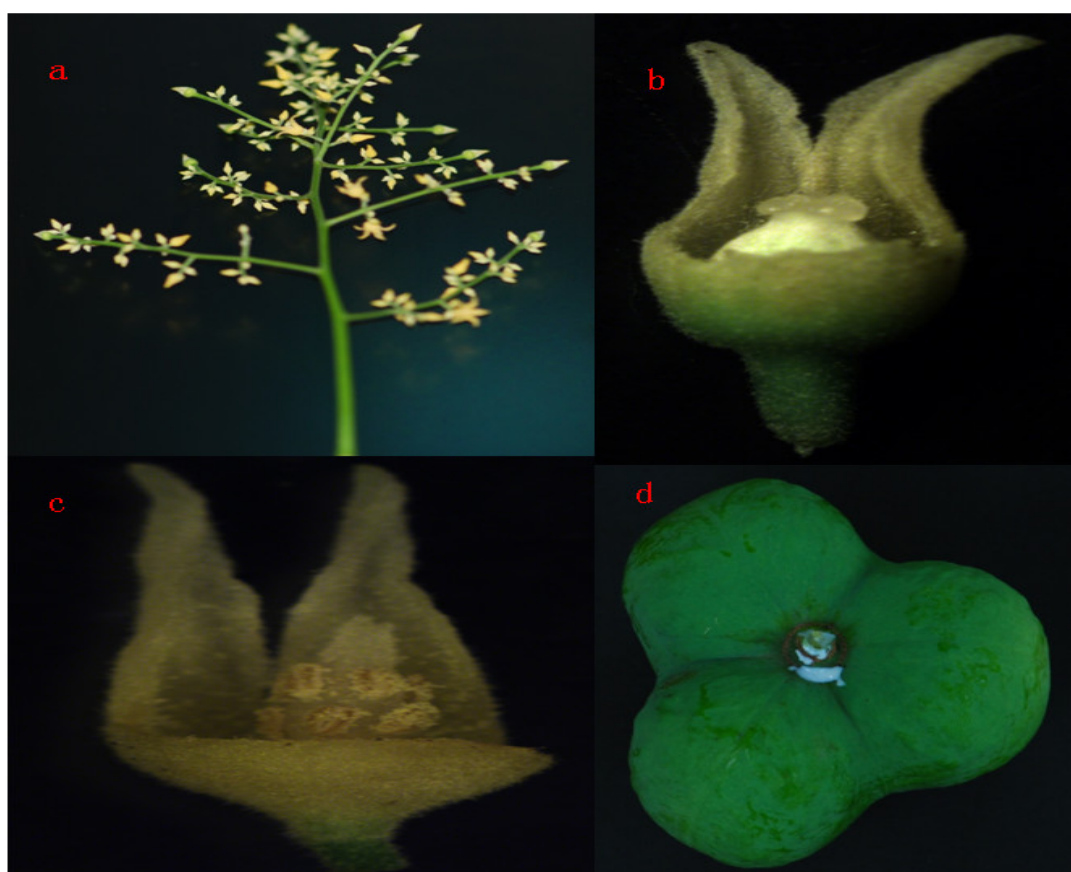

**Figure S1.** Tissue samples of rubber tree flowers. a: inflorescence; b: female flower; c: male flower; d: fruit.

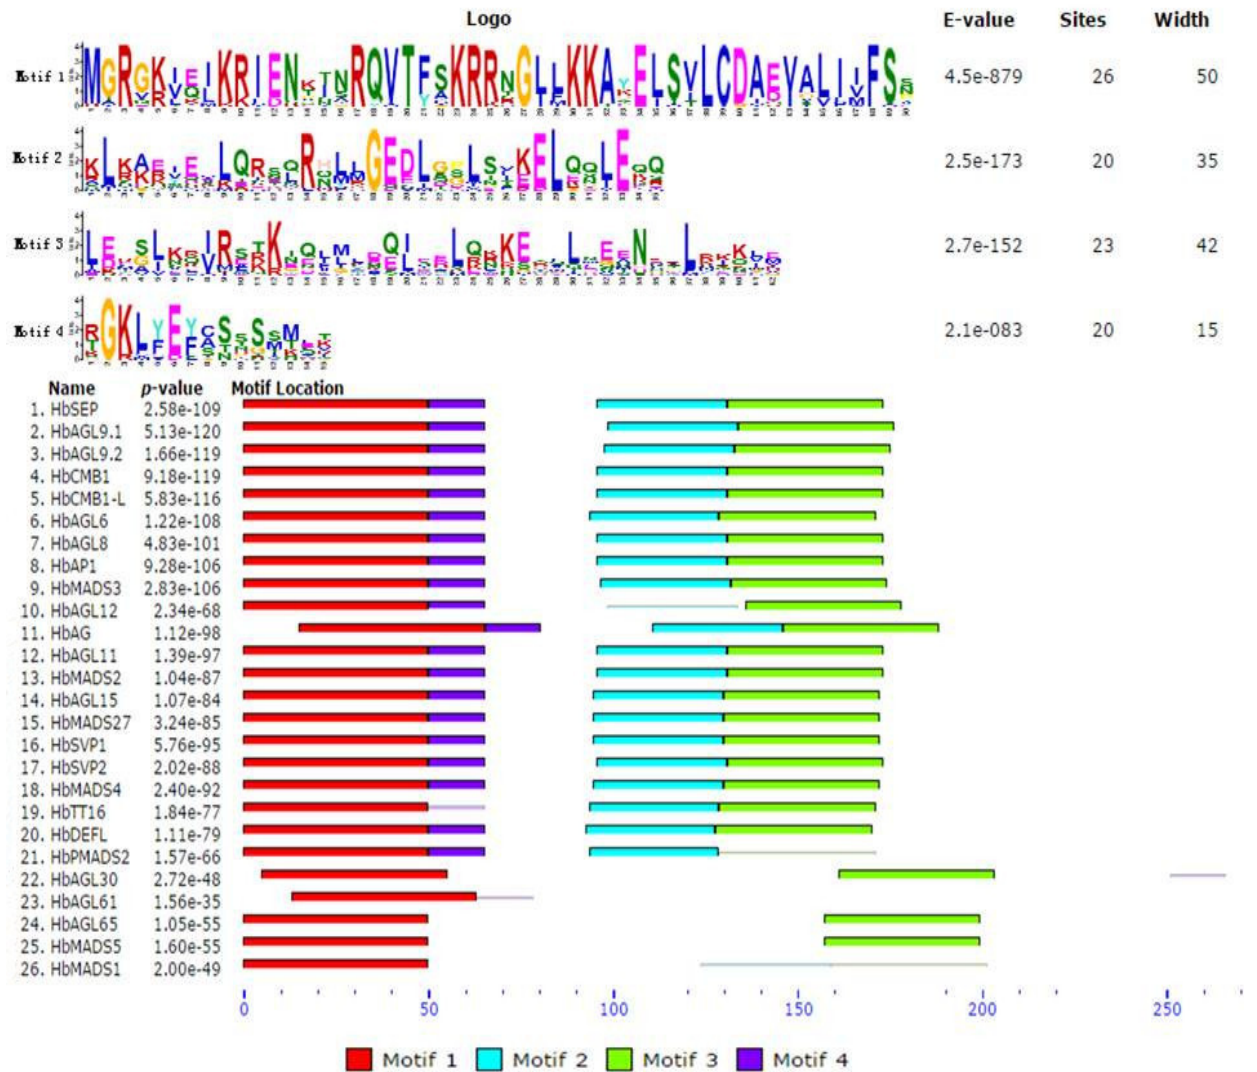

**Figure S2.** The conserved domain logo and motif composition of HbMADS-box genes. Motif 1 and Motif 3 present M-box, Motif 2 and Motif 4 present K-box.

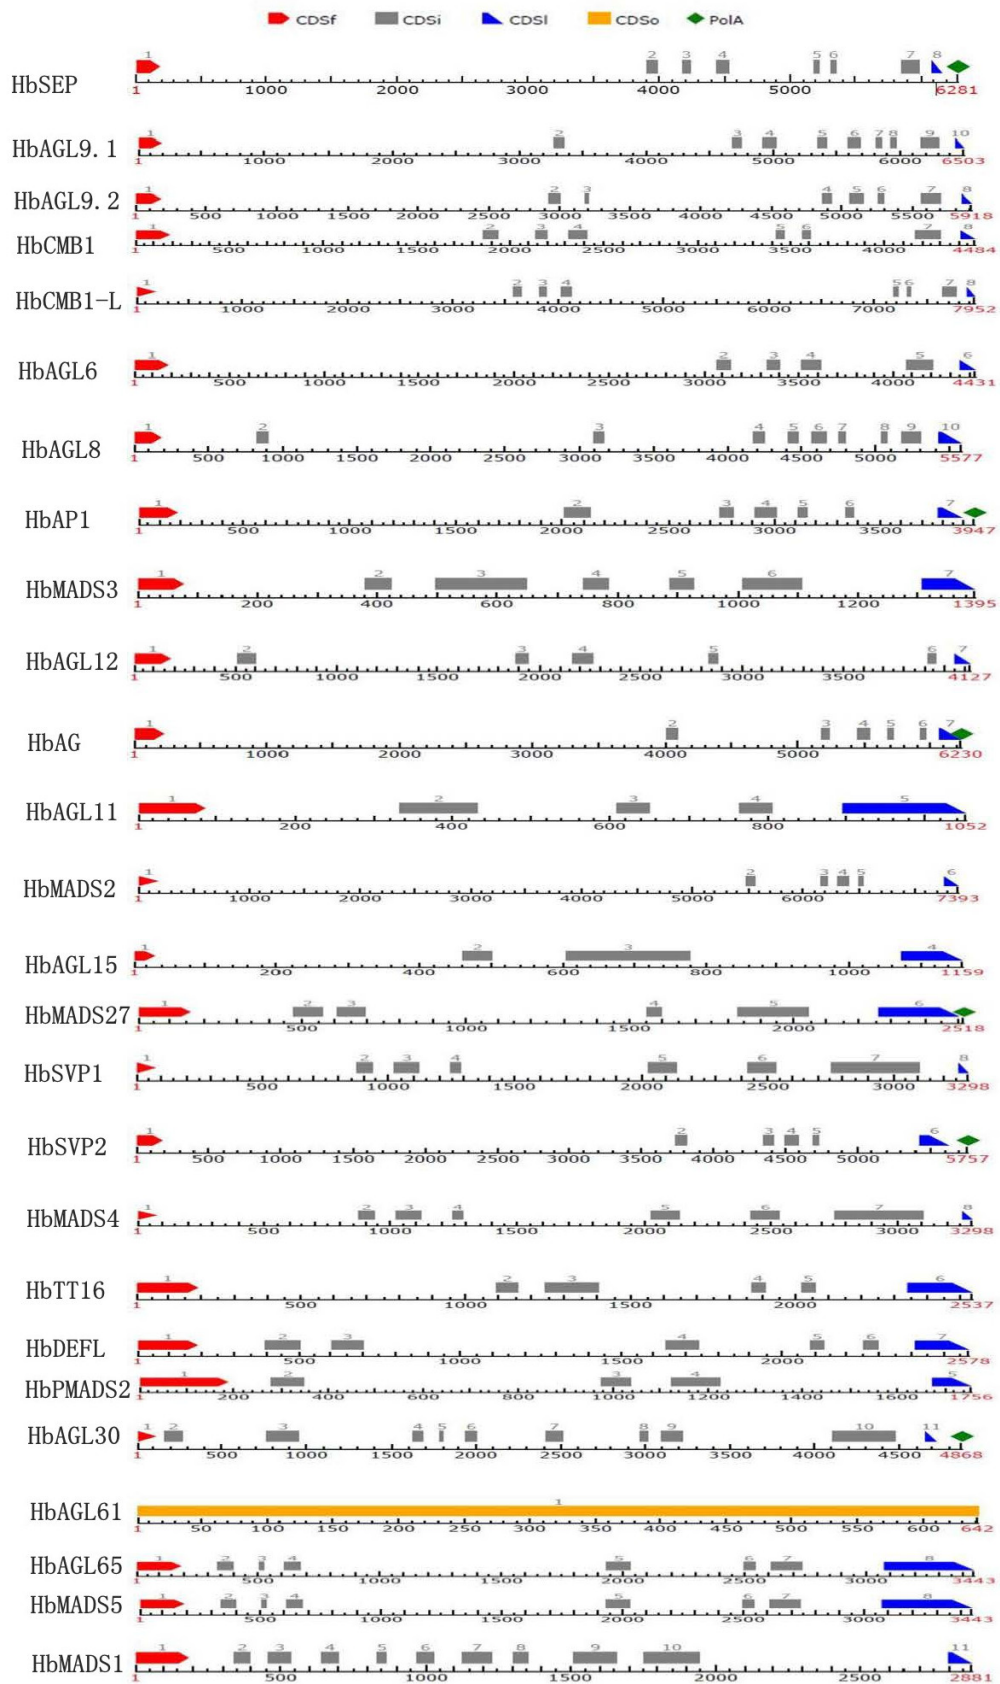

**Figure S3.** Exon-intron structures of HbMads-box genes. CDSf: the first exons (starting with start codon) are represented by red boxes; CDSi: internal exons are represented by grey boxes; CDSl: the last exons (ending with stop codon) are represented by blue boxes; CDSo: gene contains the one coding exon are represented by yellow boxes; PolA: terminal polyA signal are represented by green boxes. Scales show the length of each gene's exons and introns in bp.

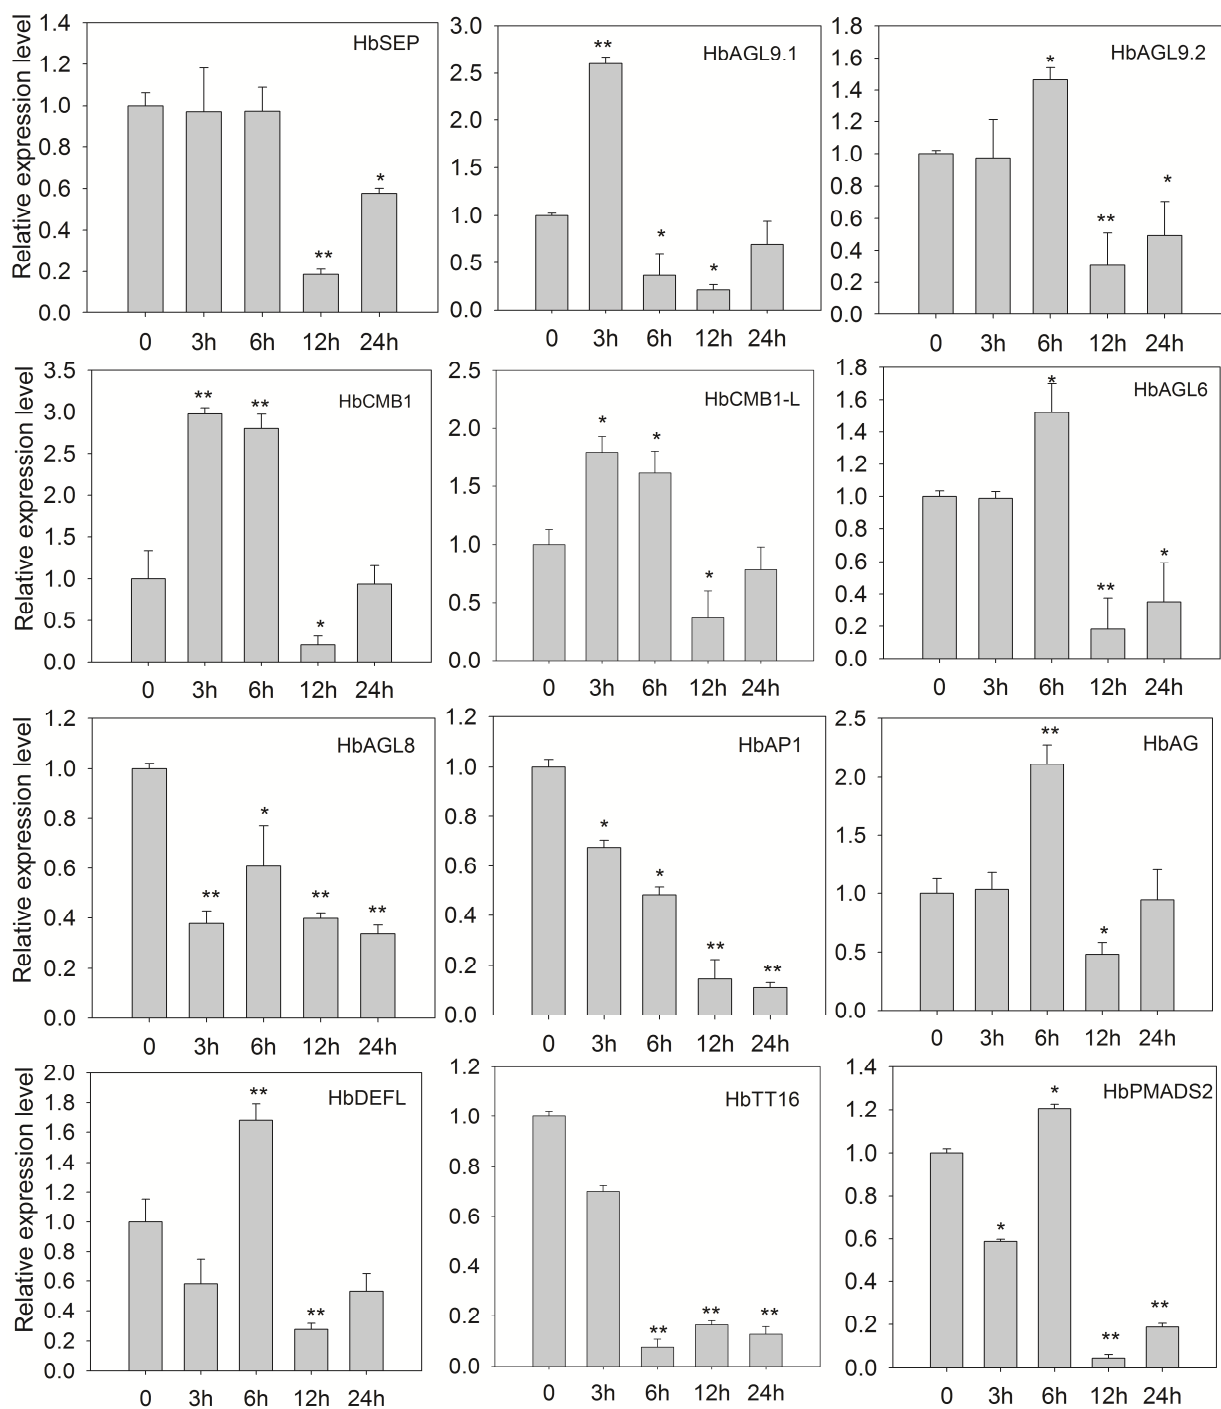

**Figure S4.** Expression profiles of the floral organ specific HbMad-box genes under cold stress. Leaves of seedlings were sampled at 0, 3, 6, 12, and 24 h after cold (5°C) stress treatment. Relative expression level of each HbMad-box gene was normalized with 18S rRNA gene. Data are means  $\pm$  SD of three biological replicates.

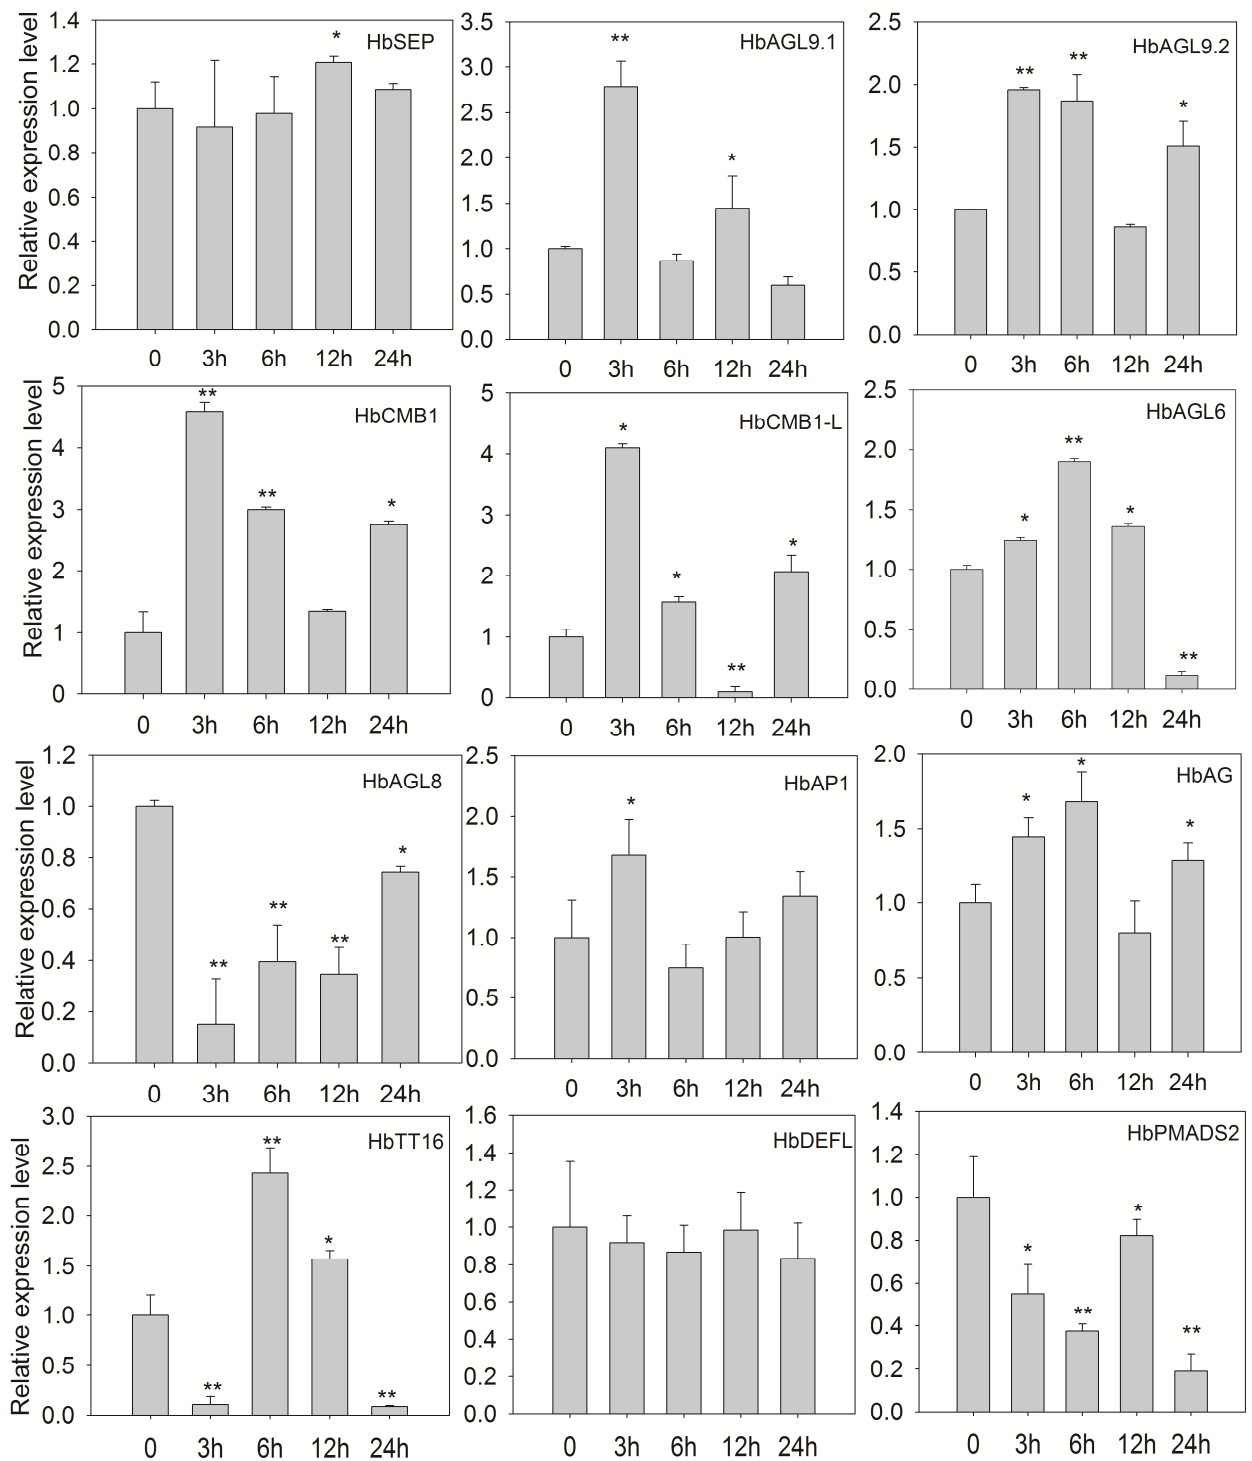

**Figure S5.** Expression profiles of the floral-enriched HbMad-box genes under high temperature stress. Leaves of seedlings were sampled at 0, 3, 6, 12, and 24 h after high temperature (40°C) stress treatment. Relative expression level of each HbMad-box gene was normalized with 18S rRNA gene. Data are means  $\pm$  SD of three biological replicates.

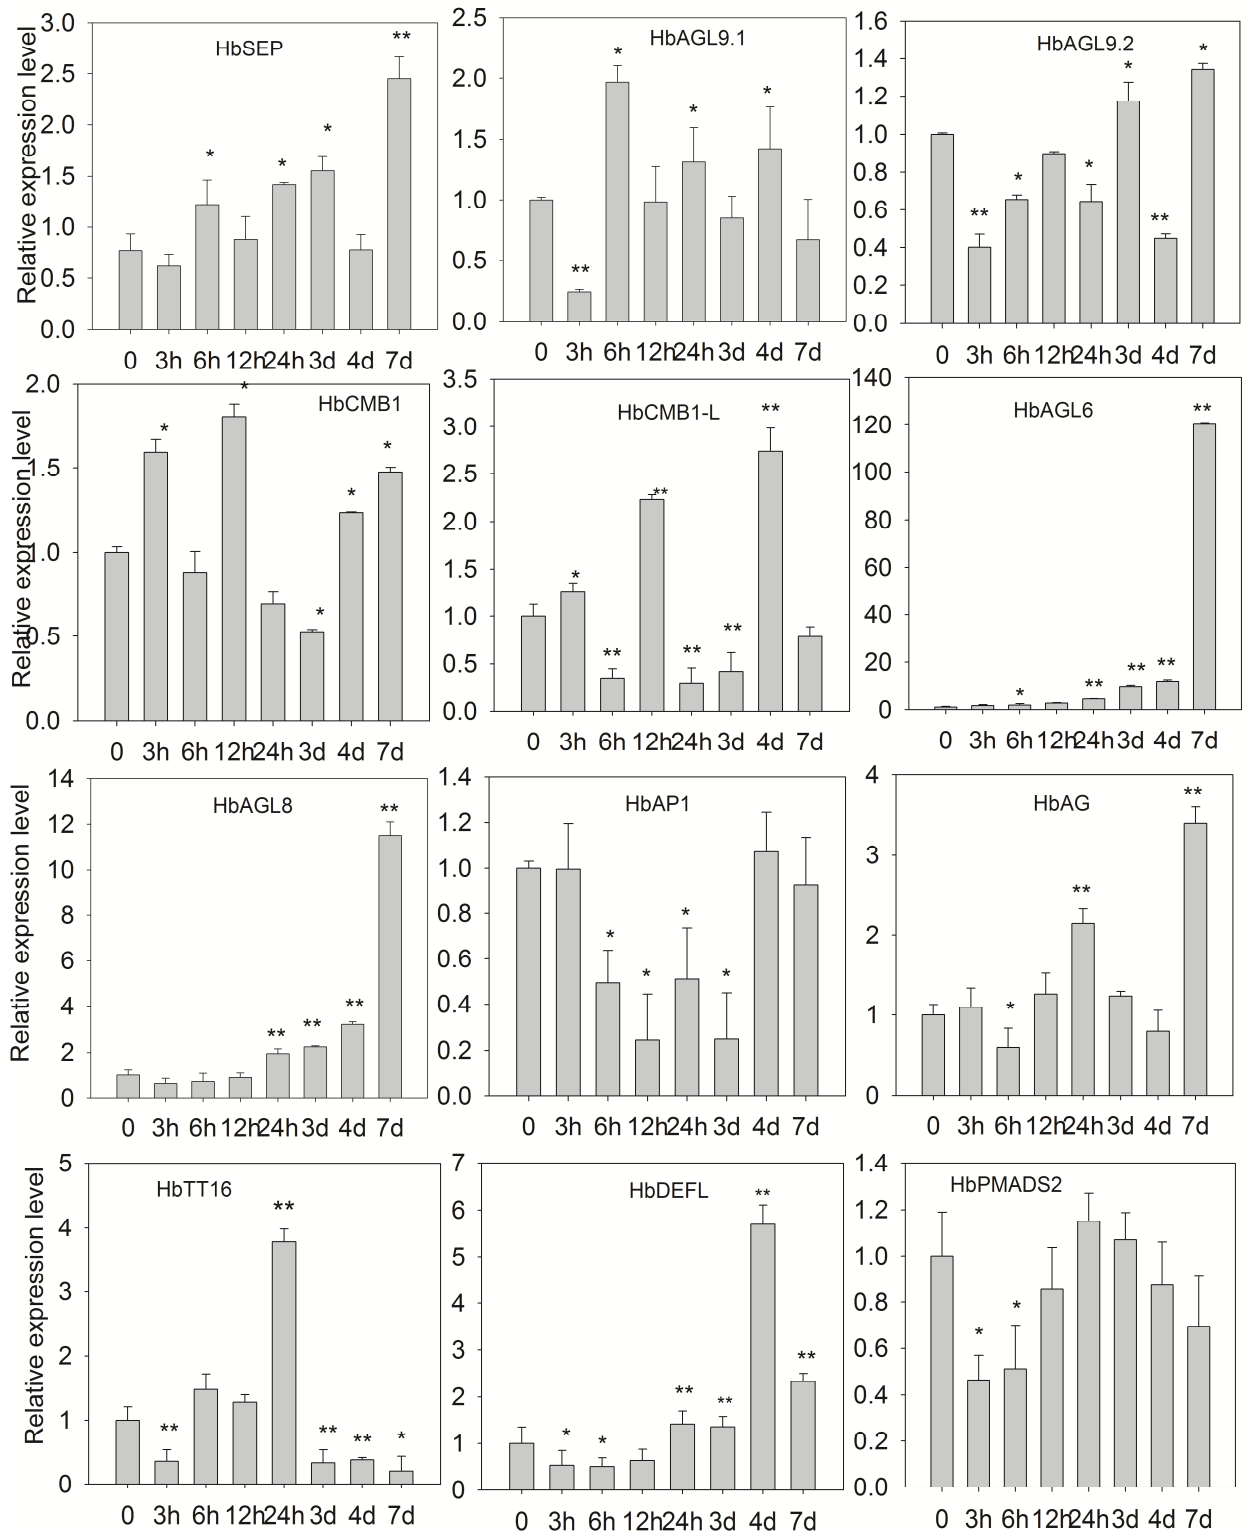

**Figure S6.** Expression profiles of the floral-enriched HbMad-box genes under drought stress. Leaves of seedlings were sampled at 0 h, 3 h, 6 h, 12 h, 24 h, 3 days, 4 days, and 7 days after drought stress treatment. Relative expression level of each HbMad-box gene was normalized with 18S rRNA gene. Data are means  $\pm$  SD of three biological replicates.



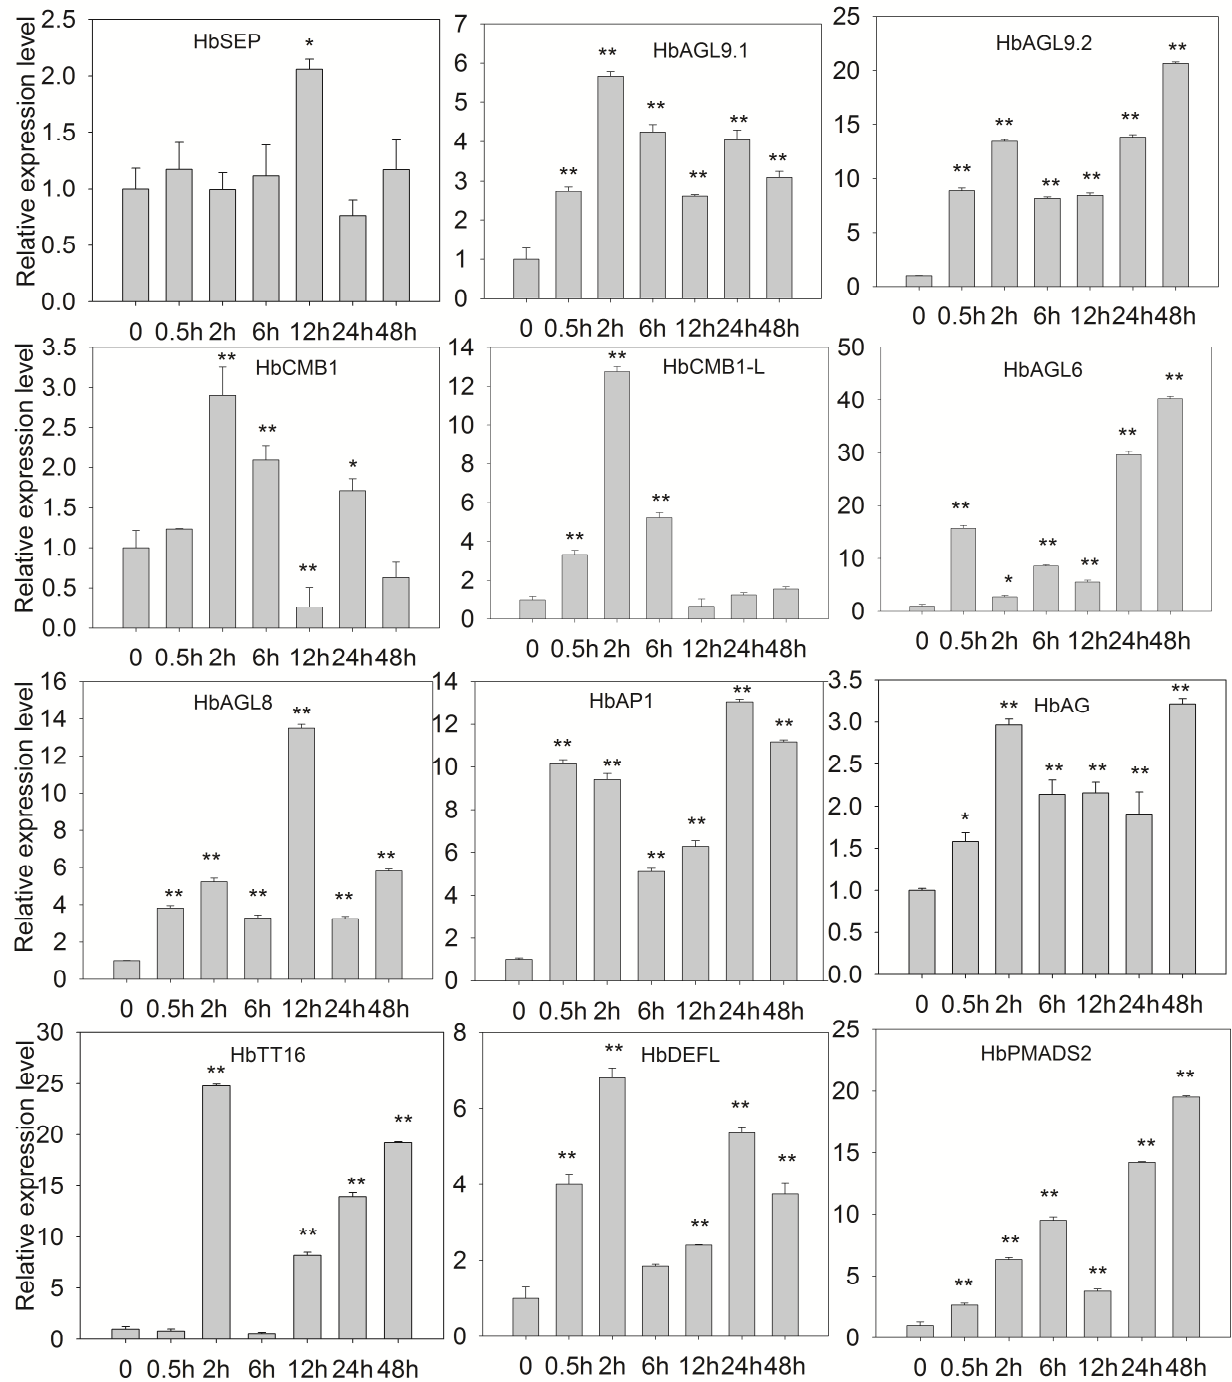

**Figure S7.** Expression profiles of the floral-enriched HbMad-box genes under salt stress. Leaves of seedlings were sampled at 0, 0.5, 2, 6, 12, 24, and 48 h after salt stress (1 M NaCl) treatment. Relative expression level of each HbMad-box gene was normalized with 18S rRNA gene. Data are means  $\pm$  SD of three biological replicates.

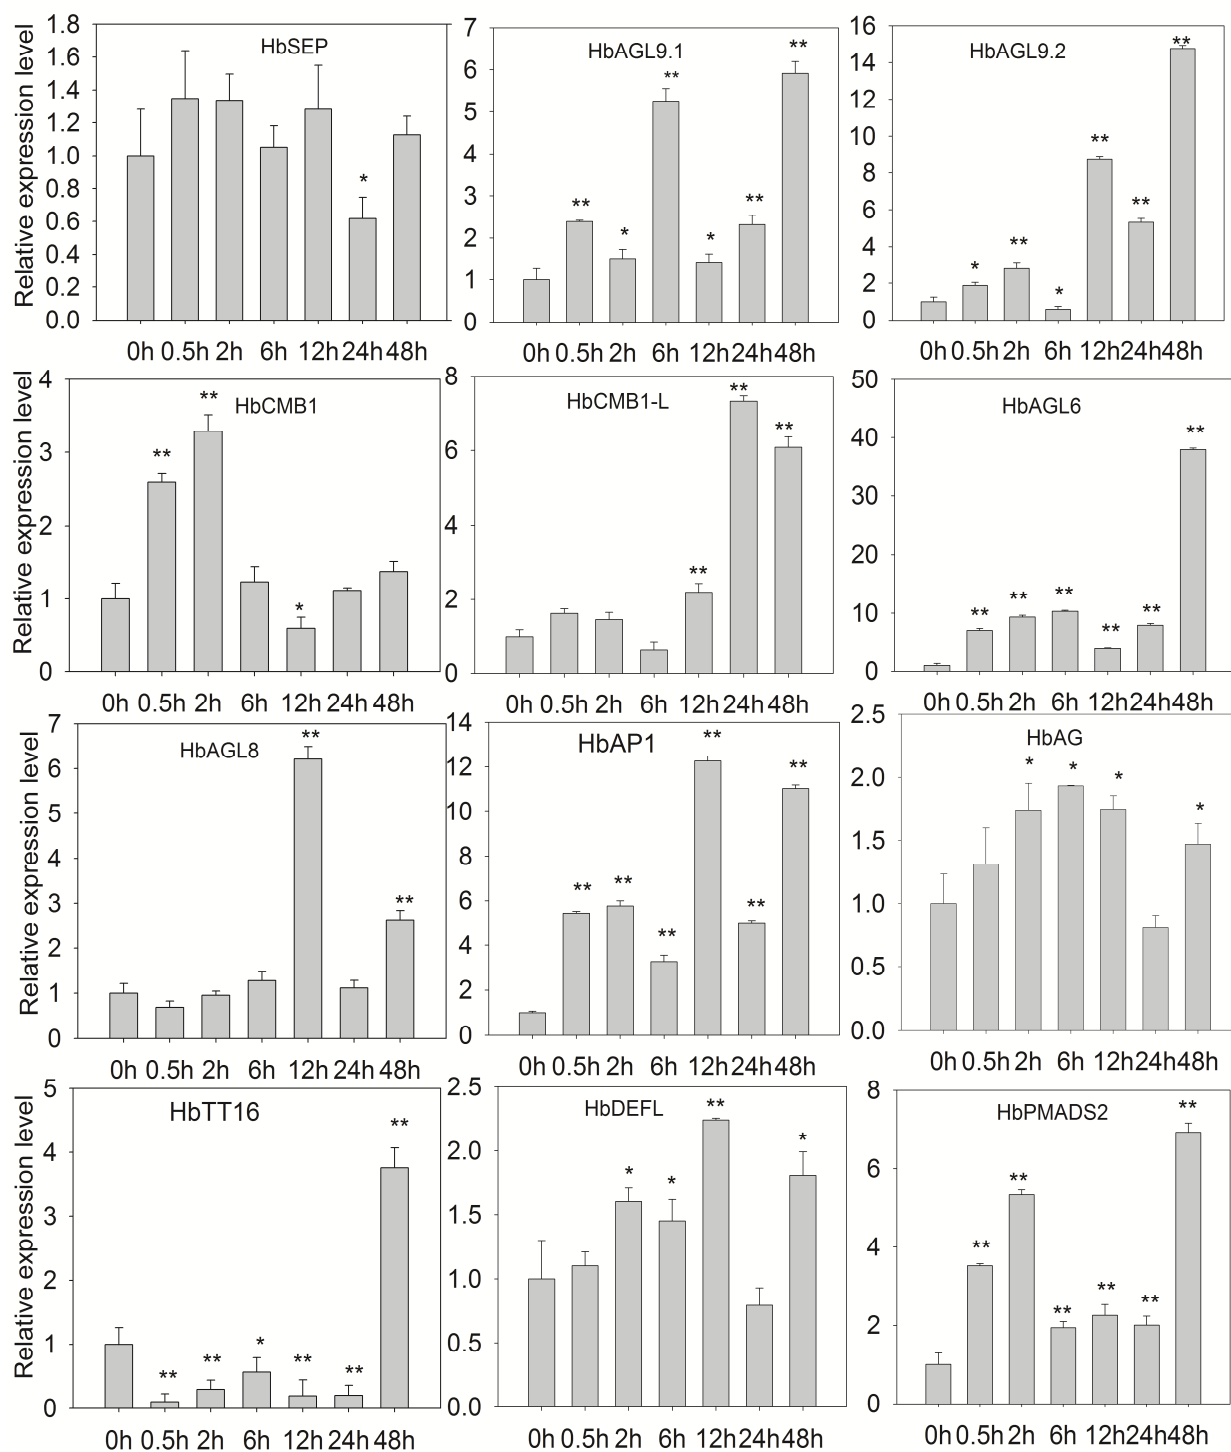

**Figure S8.** Expression profiles of the floral-enriched HbMad-box genes responding to ABA treatment. Leaves of seedlings were sampled at 0, 0.5, 2, 6, 12, 24, and 48 h after ABA treatment. Relative expression level of each HbMad-box gene was normalized with 18S rRNA gene. Data are means  $\pm$  SD of three biological replicates.



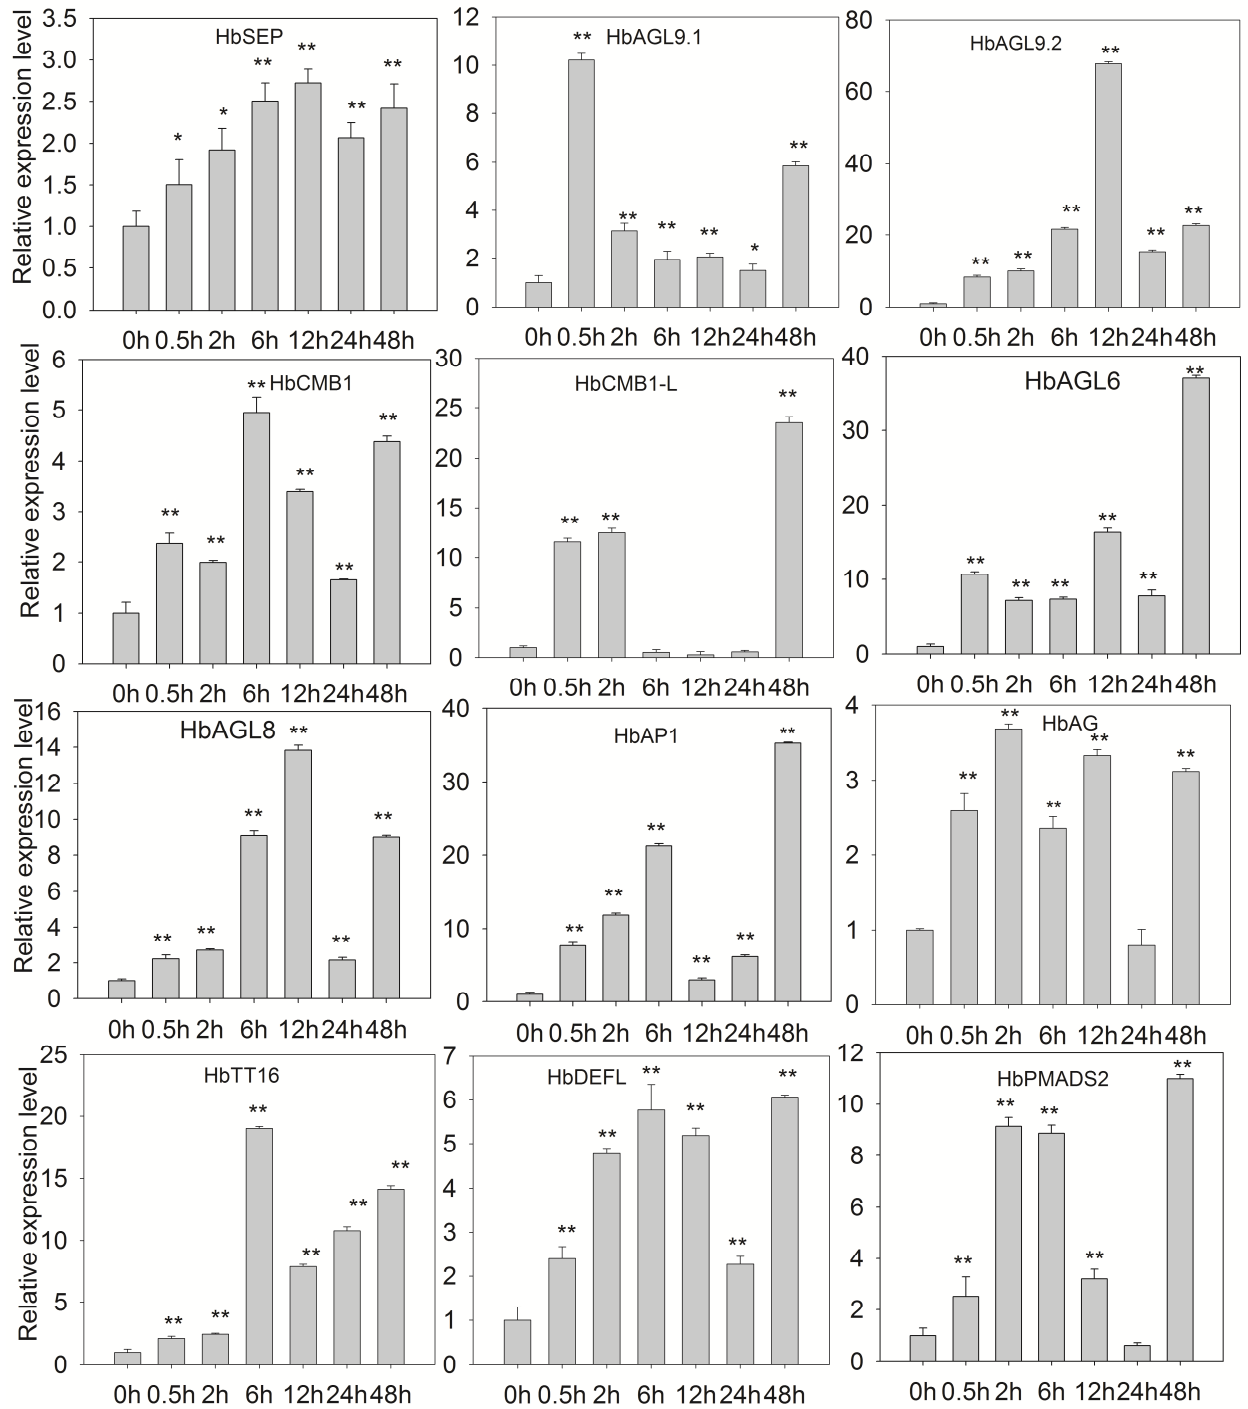

**Figure S9.** Expression profiles of the floral-enriched HbMad-box genes responding to GA3 treatment. Leaves of seedlings were sampled at 0, 0.5, 2, 6, 12, 24, and 48 h after GA3 treatment. Relative expression level of each HbMad-box gene was normalized with 18S rRNA gene. Data are means  $\pm$  SD of three biological replicates.

**Table S1.** List of primer sequences used for HbMad-box TFs amplification.

| <b>Gene</b>     | <b>Forward primer (5'-3')</b> | <b>Reverse primer (5'-3')</b> |
|-----------------|-------------------------------|-------------------------------|
| <i>HbSEP</i>    | ATGGGGAGGGGAAGAGTGGA          | TCAAAGCATCCATCCAGG            |
| <i>HbAGL9.1</i> | ATGGGGAGAGGTAGGGTTGA          | TCAGGGTAACCATTCTGGCATGTA      |
| <i>HbAGL9.2</i> | ATGGGAAGAGGTAGGGTTGA          | AGTCTTCTTGTCAGGGTAACCATCC     |
| <i>HbCMB1</i>   | ATGGGGAGAGGGAAAGTGGAGTT       | CTATTCATTGACATGACGAAGC        |
| <i>HbCMB1-L</i> | ATGGGTAGAGGAAGGGTAGAGC        | TTAAAGCATCCACCCAGGCAAG        |
| <i>HbAGL6</i>   | ATGGGAAGAGGAAGAGTGAG          | TTAAAGGATCCATCCCTGCAT         |
| <i>HbAGL8</i>   | ATGGGAAGAGGTAGGGTT            | CTATTCATTGACATGACGAAGC        |
| <i>HbAP1</i>    | ATGGGGCGAGGTAGGGTTCAGTTGA     | TCATGTGGTGAAGCATCCAAGGT       |
| <i>HbAGL12</i>  | ATGGCTCGAGGAAAGGTTTCAGAT      | CAACCCCATCAAACACTATTTCTAA     |
| <i>HbAG</i>     | ATGGCATACCAGAGCGAG            | TTAAACTAACTGAAGGGACATCTG      |
| <i>HbAGL11</i>  | ATGGGAAGAGGAAAGATCGAGAT       | TTACCCAAGATGGAGAATCTTG        |
| <i>HbAGL15</i>  | ATGGGTAGAGGGAAGATTGAAA        | TCACAGCAAGACTAATTGGCTCCAT     |
| <i>HbSVP1</i>   | ATGACAAGGCAGAAAATCCAGA        | TCAATCTGGGAAGGGTAA            |
| <i>HbSVP2</i>   | ATGGCTAGGGAGAAGATTCAG         | TTATCCGTTGTACGGTAACCCCA       |
| <i>HbTT16</i>   | ATGGGTCGTGGCAAGATA            | TTAAACATTGGAACCTTG            |
| <i>HbDEFL</i>   | ATGGGTCGTGGAAAGATCG           | TTAAGCTAGGCGGAGTTCA           |
| <i>HbPMADS2</i> | ATGGGAAGAGGAAAGATTGAGA        | TTACATCCTCTCCTGCAAAT          |
| <i>HbAGL30</i>  | ATGCAACCCTATATGATGG           | TCAGGAAATTCTGTAATATTC         |
| <i>HbAGL61</i>  | ATGGATGGAACGACCGACC           | TTAAAGAAACCCATTATTCAAACC      |
| <i>HbAGL65</i>  | ATGGGAAGGGTGAAGCTAAAG         | TTACAACCTTACAAGGTACTGGGAC     |

**Table S2.** List of primer sequences used for qRT-PCR analysis.

| <b>Gene</b>     | <b>Forward primer (5'-3')</b> | <b>Reverse primer (5'-3')</b> |
|-----------------|-------------------------------|-------------------------------|
| <i>HbSEP</i>    | GAAGGTGGTGAGCAAAGCAT          | TGTGGCAGTCATCTGGTCTG          |
| <i>HbAGL9.1</i> | GGGTAACCATTCTGGCATGT          | CAGGGAGATGGCTTCTTTCA          |
| <i>HbAGL9.2</i> | ACCTCGGCATCACAAAGAAC          | GGAAGGAGAGAAATGGGAAGA         |
| <i>HbCMB1</i>   | TGGTAGTTGCTCTGTGTCTCG         | TGTGATGCTGAGGTTGCTCT          |
| <i>HbCMB1-L</i> | TGCAAGGGATCGACTAAACC          | GGAAACTGATGCAACCCTTC          |
| <i>HbAGL6</i>   | TGAGGAGTGAAGCAACAACG          | TGATGCTGAAGTTGCCCTTA          |
| <i>HbAGL8</i>   | GGGCAGAATCAAACCTCCTT          | AGCCTCCTCATCTTCGTTCA          |
| <i>HbAP1</i>    | ATGCTGAGGTCGCTTTGATT          | TGCTGTGAGTTGCCTCTCTG          |
| <i>HbMADS3</i>  | CGGTCAAGGAGAAGGAGAAG          | GCATTGGTGGTGGTAGAACA          |
| <i>HbAGL12</i>  | GGGGTTAGCTGGGAAGAAAG          | GCAAATCCACCCTGATCTCT          |
| <i>HbAG</i>     | GGAGAATGGGTAGGGGAAAG          | AGAGCAACCTCAGCATCACA          |
| <i>HbAGL11</i>  | CAAGAGGATAGAGAACACGACGA       | CAGCATCACAAAGGACTGACAA        |
| <i>HbMADS2</i>  | CATAGAGAACGCCACAAGCA          | GAGAAGACGATAAGGGCAACC         |
| <i>HbAGL15</i>  | GGTTTCTTCCCGTCAACAGA          | CGAATCTCCTTTCTCCATCG          |
| <i>HbSVP1</i>   | TGCCTTGCTGTATGGTTGTC          | TCCTTGTGCCTTCTGCTTCT          |
| <i>HbSVP2</i>   | GGTCCTCCACACGACTATGAA         | TCAAACCAGACAACGCAAAG          |
| <i>HbTT16</i>   | TGGCAATATGTACCGTTGGA          | TCTCCACAAAAGGGGAATTG          |
| <i>HbDEFL</i>   | CTTCTTCCTGCGGGTGTCT           | TGATGTGAGCTTCGATGAGC          |
| <i>HbPMADS2</i> | CGACAACATGCAGATTGAGC          | TGTCACGAATAGTGGCAAGG          |
| <i>HbAGL30</i>  | TCTTCATCAGGACCATGTGC          | CCCAAACGAAGCTACCACTC          |
| <i>HbAGL61</i>  | ATTGCTGCCGATTTCCAGTA          | TTTCTCCGAACATGGGAAAG          |
| <i>HbAGL65</i>  | TAGGTCACTTGCCGATTGCT          | TAGTTGTGGTGCTGGGATGA          |
| <i>HbMADS1</i>  | TCGTCCTCCAAACCACTTCT          | TTCGTCAGAGAGAGCCACAA          |
| <i>18S RNA</i>  | GCTCGAAGACGATCAGATACC         | TTCAGCCTTGCGACCATAC           |

**Table S3.** Sequence features of AtMADSs in *A. thaliana*

|          | <b>Name</b> | <b>Gene ID</b> | <b>Len (AA)</b> | <b>pI</b> | <b>Mw (KDa)</b> |
|----------|-------------|----------------|-----------------|-----------|-----------------|
| HbSEP    | AtSEP2      | 821151         | 250             | 8.64      | 28.58           |
| HbAGL9.1 | AtSEP3      | 839040         | 251             | 8.27      | 29.07           |
| HbAGL9.2 | AtSEP3      | 839040         | 251             | 8.27      | 29.07           |
| HbCMB1   | AtSHP2      | 818883         | 248             | 9.4       | 28.38           |
| HbCMB1-L | AtSHP2      | 818883         | 248             | 9.4       | 28.38           |
| HbAGL6   | AtAGL6      | 819173         | 252             | 7.6       | 28.74           |
| HbAGL8   | AtAGL8      | 836212         | 242             | 9.36      | 27.54           |
| HbAP1    | AtAP1       | 843244         | 276             | 9.64      | 31.93           |
| HbMADS3  | AtAGL79     | 822726         | 249             | 9.56      | 28.08           |
| HbAGL12  | AtAGL12     | 843497         | 211             | 6.76      | 23.92           |
| HbAG     | AtAG        | 827631         | 125             | 6.84      | 14.36           |
| HbAGL11  | AtSTK       | 826586         | 256             | 9.64      | 29.48           |
| HbMADS2  | AtAGL19     | 828394         | 219             | 9.35      | 25.05           |
| HbAGL15  | AtAGL15     | 831224         | 268             | 8.58      | 30.33           |
| HbMADS27 | AtAGL44     | 815907         | 234             | 9.69      | 26.8            |
| HbSVP2   | AtAGL24     | 828556         | 220             | 8.35      | 25.06           |
| HbSVP1   | AtSVP       | 816787         | 240             | 5.44      | 26.89           |
| HbMADS4  | AtSVP       | 816787         | 240             | 5.44      | 26.89           |
| HbTT16   | AtTT16      | 832390         | 252             | 6.14      | 29.69           |
| HbDEFL   | AtAP3       | 824601         | 232             | 8.71      | 27.34           |
| HbPMADS2 | AtPI        | 832146         | 208             | 9.06      | 24.05           |
| HbMADS1  | AtGOA       | 839999         | 215             | 9.4       | 25.17           |
| HbAGL30  | AtAGL30     | 814835         | 386             | 6.43      | 43.9            |
| HbAGL61  | AtAGL61     | 817021         | 264             | 9.58      | 30.26           |
| HbAGL65  | AtAGL65     | 838457         | 389             | 6.05      | 44.98           |
| HbMADS5  | AtAGL94     | 843289         | 344             | 6.67      | 39.22           |

**Table S4.** Percent identity matrix of HbMad-box TFs proteins.

|          | HbSEP | HbAGL9.1 | HbAGL9.2 | HbCMB1 | HbCMB1-L | HbAGL6 | HbAGL8 | HbAP1 | HbMADS3 | HbAGL12 | HbAG  | HbAGL11 | HbMADS2 | HbAGL15 | HbMADS27 | HbSVP1 | HbSVP2 | HbMADS4 | HbTT16 | HbDEFL | HbPMADS2 | HbAGL30 | HbAGL61 | HbAGL65 | HbMADS5 | HbMADS1 |
|----------|-------|----------|----------|--------|----------|--------|--------|-------|---------|---------|-------|---------|---------|---------|----------|--------|--------|---------|--------|--------|----------|---------|---------|---------|---------|---------|
| HbSEP    | 100   |          |          |        |          |        |        |       |         |         |       |         |         |         |          |        |        |         |        |        |          |         |         |         |         |         |
| HbAGL9.1 | 61.79 | 100      |          |        |          |        |        |       |         |         |       |         |         |         |          |        |        |         |        |        |          |         |         |         |         |         |
| HbAGL9.2 | 63.67 | 92.59    | 100      |        |          |        |        |       |         |         |       |         |         |         |          |        |        |         |        |        |          |         |         |         |         |         |
| HbCMB1   | 70.37 | 62.04    | 63.11    | 100    |          |        |        |       |         |         |       |         |         |         |          |        |        |         |        |        |          |         |         |         |         |         |
| HbCMB1-L | 64.75 | 58.3     | 59.84    | 67.21  | 100      |        |        |       |         |         |       |         |         |         |          |        |        |         |        |        |          |         |         |         |         |         |
| HbAGL6   | 52.44 | 52.8     | 55.06    | 53.66  | 52.24    | 100    |        |       |         |         |       |         |         |         |          |        |        |         |        |        |          |         |         |         |         |         |
| HbAGL8   | 41.34 | 41.18    | 40.55    | 42.69  | 43.53    | 40.71  | 100    |       |         |         |       |         |         |         |          |        |        |         |        |        |          |         |         |         |         |         |
| HbAP1    | 41.87 | 40.57    | 41.53    | 41.56  | 45.12    | 45.34  | 59.13  | 100   |         |         |       |         |         |         |          |        |        |         |        |        |          |         |         |         |         |         |
| HbMADS3  | 42.17 | 40.57    | 42.45    | 42.34  | 45.16    | 42.68  | 56.47  | 64.34 | 100     |         |       |         |         |         |          |        |        |         |        |        |          |         |         |         |         |         |
| HbAGL12  | 33.47 | 32.65    | 32.1     | 32.39  | 33.6     | 30.12  | 29.57  | 29.67 | 27.98   | 100     |       |         |         |         |          |        |        |         |        |        |          |         |         |         |         |         |
| HbAG     | 33.59 | 34.5     | 36.96    | 38.37  | 36.43    | 35.91  | 33.21  | 31.64 | 32.68   | 33.33   | 100   |         |         |         |          |        |        |         |        |        |          |         |         |         |         |         |
| HbAGL11  | 36.89 | 38.68    | 38.75    | 41.98  | 37.04    | 38.52  | 30.95  | 37.04 | 36.25   | 33.48   | 65.15 | 100     |         |         |          |        |        |         |        |        |          |         |         |         |         |         |
| HbMADS2  | 36.89 | 37.45    | 37.08    | 37.68  | 37.45    | 38.52  | 35.97  | 35.63 | 32.78   | 34.23   | 35.68 | 38.22   | 100     |         |          |        |        |         |        |        |          |         |         |         |         |         |
| HbAGL15  | 33.98 | 35.04    | 35.27    | 36.72  | 34.38    | 35.29  | 33.85  | 32.03 | 30.89   | 25      | 31    | 32.03   | 35.94   | 100     |          |        |        |         |        |        |          |         |         |         |         |         |
| HbMADS27 | 33.47 | 36.21    | 33.2     | 35.92  | 34.96    | 35.1   | 32.94  | 34.98 | 34.85   | 31.56   | 36.22 | 38.08   | 35.56   | 36.72   | 100      |        |        |         |        |        |          |         |         |         |         |         |
| HbSVP1   | 31.28 | 30.86    | 29.58    | 31.82  | 31.4     | 30.86  | 31.35  | 31.12 | 31.38   | 30.88   | 31.95 | 34.23   | 38.81   | 34.11   | 37.24    | 100    |        |         |        |        |          |         |         |         |         |         |
| HbSVP2   | 31.15 | 30.45    | 29.17    | 32.1   | 28.1     | 29.92  | 34.39  | 33.47 | 32.22   | 28.02   | 33.2  | 34.8    | 37.44   | 35.77   | 39.42    | 60.79  | 100    |         |        |        |          |         |         |         |         |         |
| HbMADS4  | 31.28 | 30.45    | 29.17    | 31.4   | 31.82    | 30.45  | 30.95  | 30.71 | 30.96   | 30.88   | 31.54 | 34.23   | 38.81   | 34.5    | 37.24    | 98.57  | 59.91  | 100     |        |        |          |         |         |         |         |         |
| HbTT16   | 33.61 | 31.73    | 35.27    | 32.51  | 30.45    | 33.2   | 32.41  | 35.12 | 32.1    | 32.23   | 30.56 | 34.87   | 37.92   | 29.84   | 33.61    | 31.22  | 30.51  | 30.8    | 100    |        |          |         |         |         |         |         |
| HbDEFL   | 28.81 | 30.04    | 31.67    | 29.75  | 30.99    | 33.47  | 27.38  | 26.56 | 27.2    | 2489    | 29.92 | 31.88   | 28.63   | 30.59   | 28.99    | 28.32  | 30.3   | 28.32   | 32.91  | 100    |          |         |         |         |         |         |
| HbPMADS2 | 30.74 | 29.1     | 29.88    | 30.45  | 27.98    | 30.58  | 27.67  | 31.82 | 27.92   | 28.18   | 27.39 | 31.53   | 31.65   | 25.1    | 27.31    | 28.57  | 29.96  | 28.11   | 34.19  | 33.33  | 100      |         |         |         |         |         |
| HbAGL30  | 15.63 | 14.29    | 15.55    | 16.17  | 16.17    | 14.82  | 16.44  | 14.78 | 13.67   | 14.21   | 13.91 | 13.75   | 14.29   | 18.87   | 16.98    | 17.25  | 17.52  | 17.25   | 15.59  | 14.56  | 14.03    | 100     |         |         |         |         |
| HbAGL61  | 22.66 | 22.27    | 23.32    | 21.96  | 20.78    | 23.44  | 18.11  | 20.78 | 21.83   | 19.27   | 21.16 | 22.88   | 21.55   | 21.27   | 20.32    | 22.22  | 24.9   | 22.67   | 19.28  | 19.83  | 18.34    | 14.51   | 100     |         |         |         |
| HbAGL65  | 21.43 | 21.96    | 21.18    | 23.23  | 23.9     | 26.07  | 21.74  | 24.21 | 21.51   | 21.95   | 22.22 | 24.6    | 25.61   | 22.96   | 23.39    | 24.39  | 18.95  | 23.17   | 25.9   | 22     | 21.86    | 40.32   | 20.38   | 100     |         |         |
| HbMADS5  | 18.16 | 17.88    | 17.04    | 18.99  | 17.08    | 16.43  | 16.48  | 18.72 | 16.2    | 15.08   | 14.48 | 18.06   | 17.6    | 20.67   | 17.6     | 16.76  | 15.92  | 17.04   | 18.11  | 16.76  | 14.76    | 50.53   | 14.25   | 64.8    | 100     |         |
| HbMADS1  | 22.19 | 24.01    | 21.99    | 24.92  | 23.71    | 23.4   | 24.24  | 25.23 | 24.92   | 18.54   | 21.8  | 22.8    | 22.73   | 22.19   | 21.58    | 19.76  | 21.88  | 19.76   | 21.52  | 20.06  | 19.76    | 21.81   | 16.03   | 23.49   | 22.78   | 100     |

**Table S5.** Statistics of exon and intron number distribution among HbMad-box TFs.

|          | <b>Exons</b> | <b>Introns</b> | <b>Group</b>      |                   | <b>Number</b> |
|----------|--------------|----------------|-------------------|-------------------|---------------|
| HbSEP    | 8            | 7              | The first group   | The first group   | 8             |
| HbAGL9.1 | 10           | 9              | The fourth group  | The second group  | 5             |
| HbAGL9.2 | 8            | 7              | The first group   | The third group   | 5             |
| HbCMB1   | 8            | 7              | The first group   | The fourth group  | 2             |
| HbCMB1-L | 8            | 7              | The first group   | The fifth group   | 2             |
| HbAGL6   | 6            | 5              | The second group  | The sixth group   | 2             |
| HbAGL8   | 10           | 9              | The fourth group  | The seventh group | 1             |
| HbAP1    | 7            | 6              | The third group   | The eighth group  | 1             |
| HbMADS3  | 7            | 6              | The third group   |                   |               |
| HbAGL12  | 7            | 6              | The third group   |                   |               |
| HbAG     | 7            | 6              | The third group   |                   |               |
| HbAGL11  | 5            | 4              | The fifth group   |                   |               |
| HbMADS2  | 6            | 5              | The second group  |                   |               |
| HbAGL15  | 4            | 3              | The seventh group |                   |               |
| HbMADS27 | 6            | 5              | The second group  |                   |               |
| HbSVP1   | 8            | 7              | The first group   |                   |               |
| HbSVP2   | 6            | 5              | The second group  |                   |               |
| HbMADS4  | 8            | 7              | The first group   |                   |               |
| HbTT16   | 6            | 5              | The second group  |                   |               |
| HbDEFL   | 7            | 6              | The third group   |                   |               |
| HbPMADS2 | 5            | 4              | The fifth group   |                   |               |
| HbAGL30  | 11           | 10             | The sixth group   |                   |               |
| HbAGL61  | 1            | 0              | The eighth group  |                   |               |
| HbAGL65  | 8            | 7              | The first group   |                   |               |
| HbMADS5  | 8            | 7              | The first group   |                   |               |
| HbMADS1  | 11           | 10             | The sixth group   |                   |               |
